# Supplementary material
Source: publisher site journal article supplement (https://www.spandidos-publications.com/3285/downloadSupplementary)

Figure S1. Expression of endogenous miR-10b following transfection of sc, miR-10b-agomir and miR-10b-antagomir in A549 cells. UT-, sc-, miR-10b-agomir- or miR-10b-antagomir-transfected A549 cells were collected for quantification of miR-10b expression levels. \*\*\*P<0.001 vs. UT. miR, microRNA; sc, scramble; UT, untransfected.

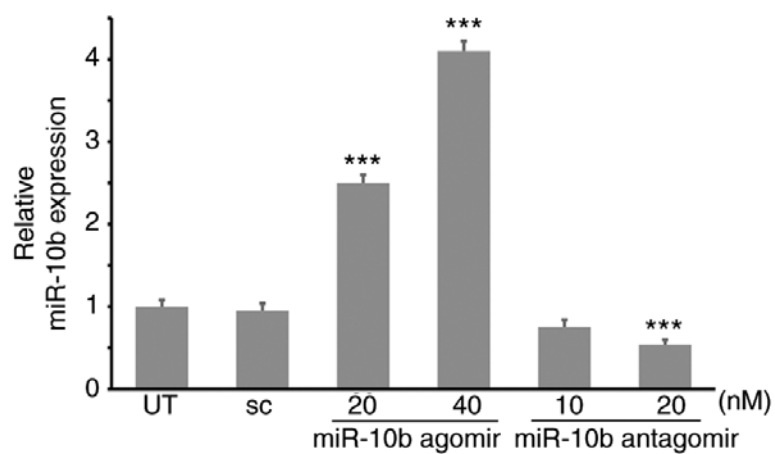

Supplement: Supplementary file 1 [file downloadSupplementary]
